# Supplementary material for: LncRNA BCYRN1 inhibits glioma tumorigenesis by competitively binding with miR-619-5p to regulate CUEDC2 expression and the PTEN/AKT/p21 pathway
Source: PubMed Central journal article supplement (PMC7644463; doi:10.1038/s41388-020-01466-x), 2020-09-25

# Supplementary figure1

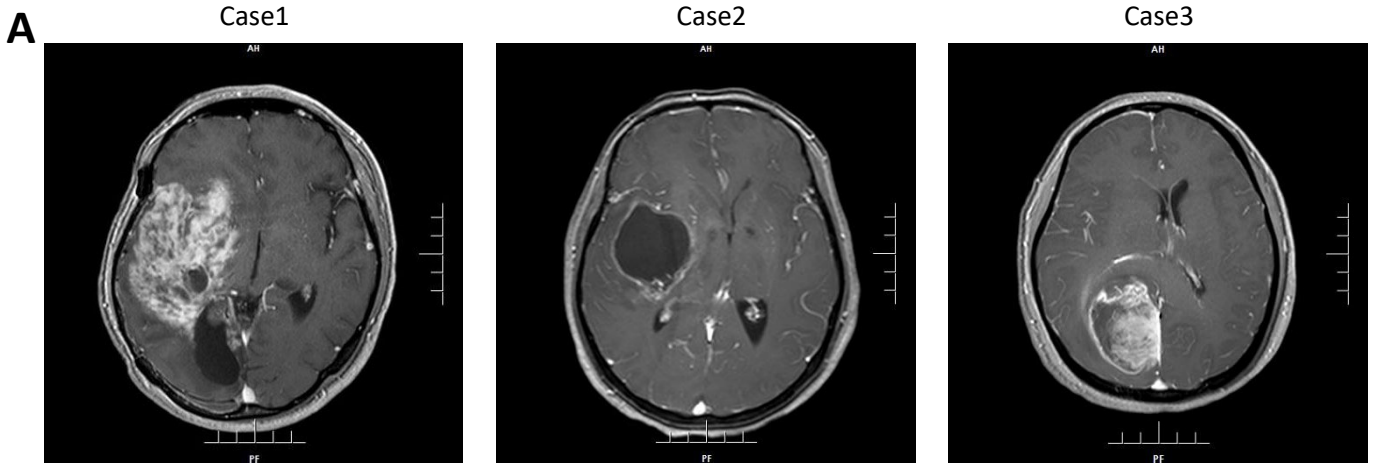

**B**

| Sample | Classification | WHO Grade | Immunohistochemically |        |       |        |      |     |
|--------|----------------|-----------|-----------------------|--------|-------|--------|------|-----|
|        |                |           | GFAP                  | Olig-2 | IDH-1 | Ki-67  | CD34 | P53 |
| Case1  | glioblastoma   | level IV  | +                     | +      | +     | +(40%) | +    | +   |
| Case2  | glioblastoma   | level IV  | +                     | +      | +     | +(50%) | +    | +   |
| Case3  | glioblastoma   | level IV  | +                     | +      | -     | +(30%) | +    | +   |

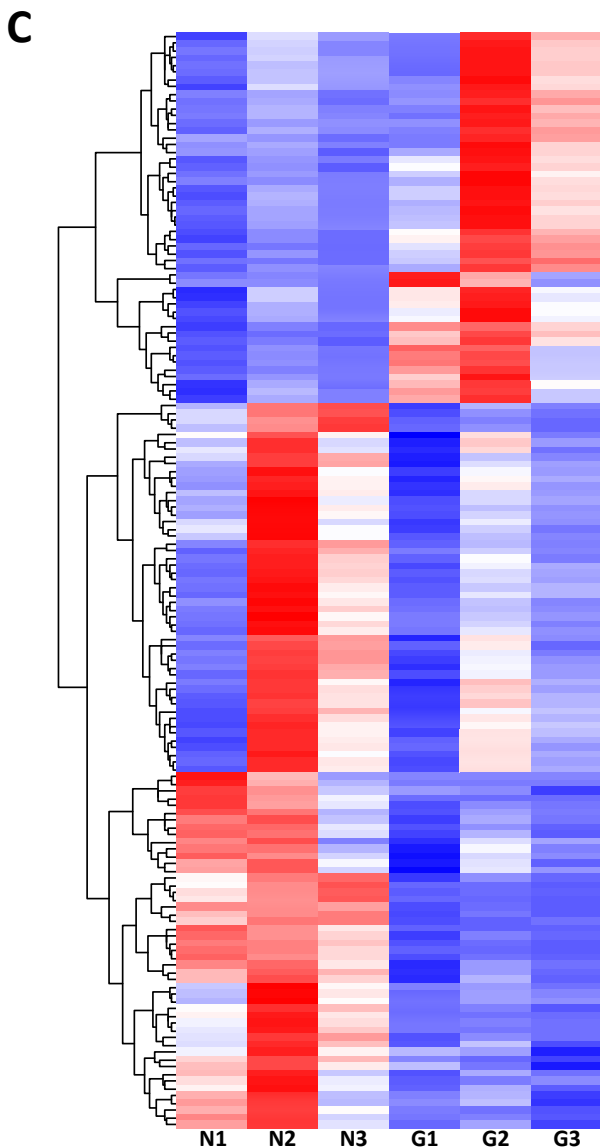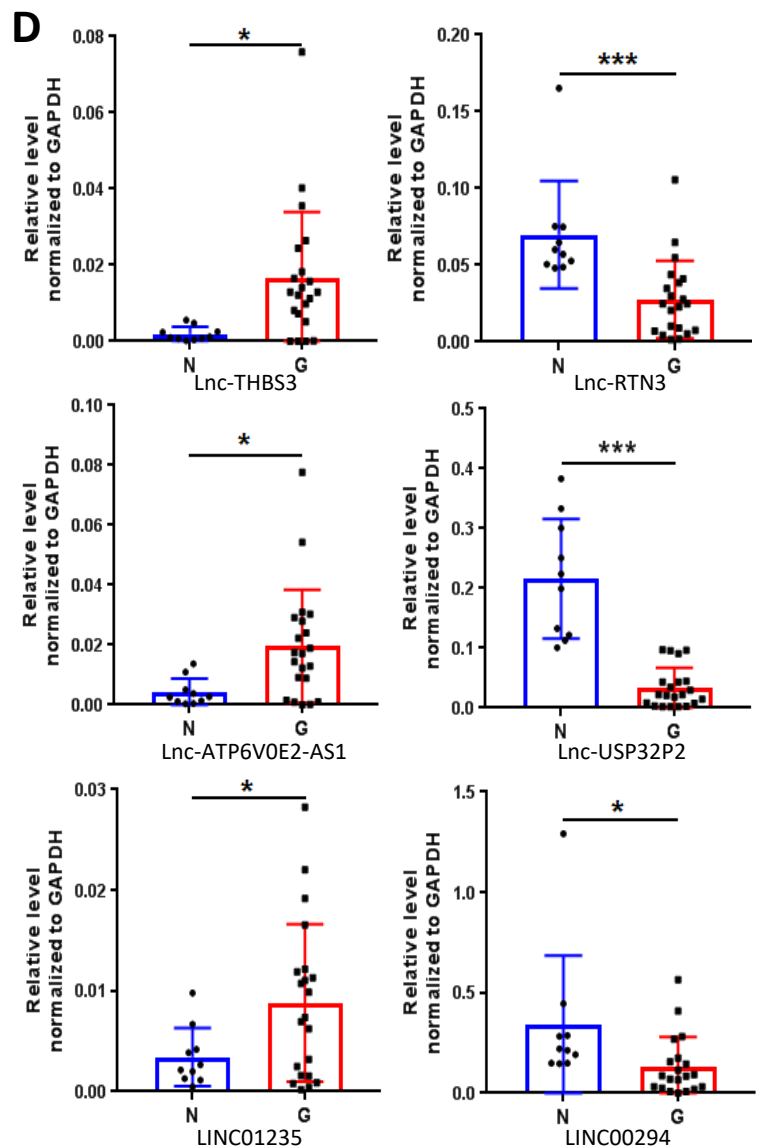

Supplement: 41388_2020_1466_MOESM2_ESM.pdf [file 41388_2020_1466_MOESM2_ESM.pdf]
