# Supplementary material for: LncRNA BCYRN1 inhibits glioma tumorigenesis by competitively binding with miR-619-5p to regulate CUEDC2 expression and the PTEN/AKT/p21 pathway
Source: PubMed Central journal article supplement (PMC7644463; doi:10.1038/s41388-020-01466-x), 2020-09-25

# Supplementary figure4

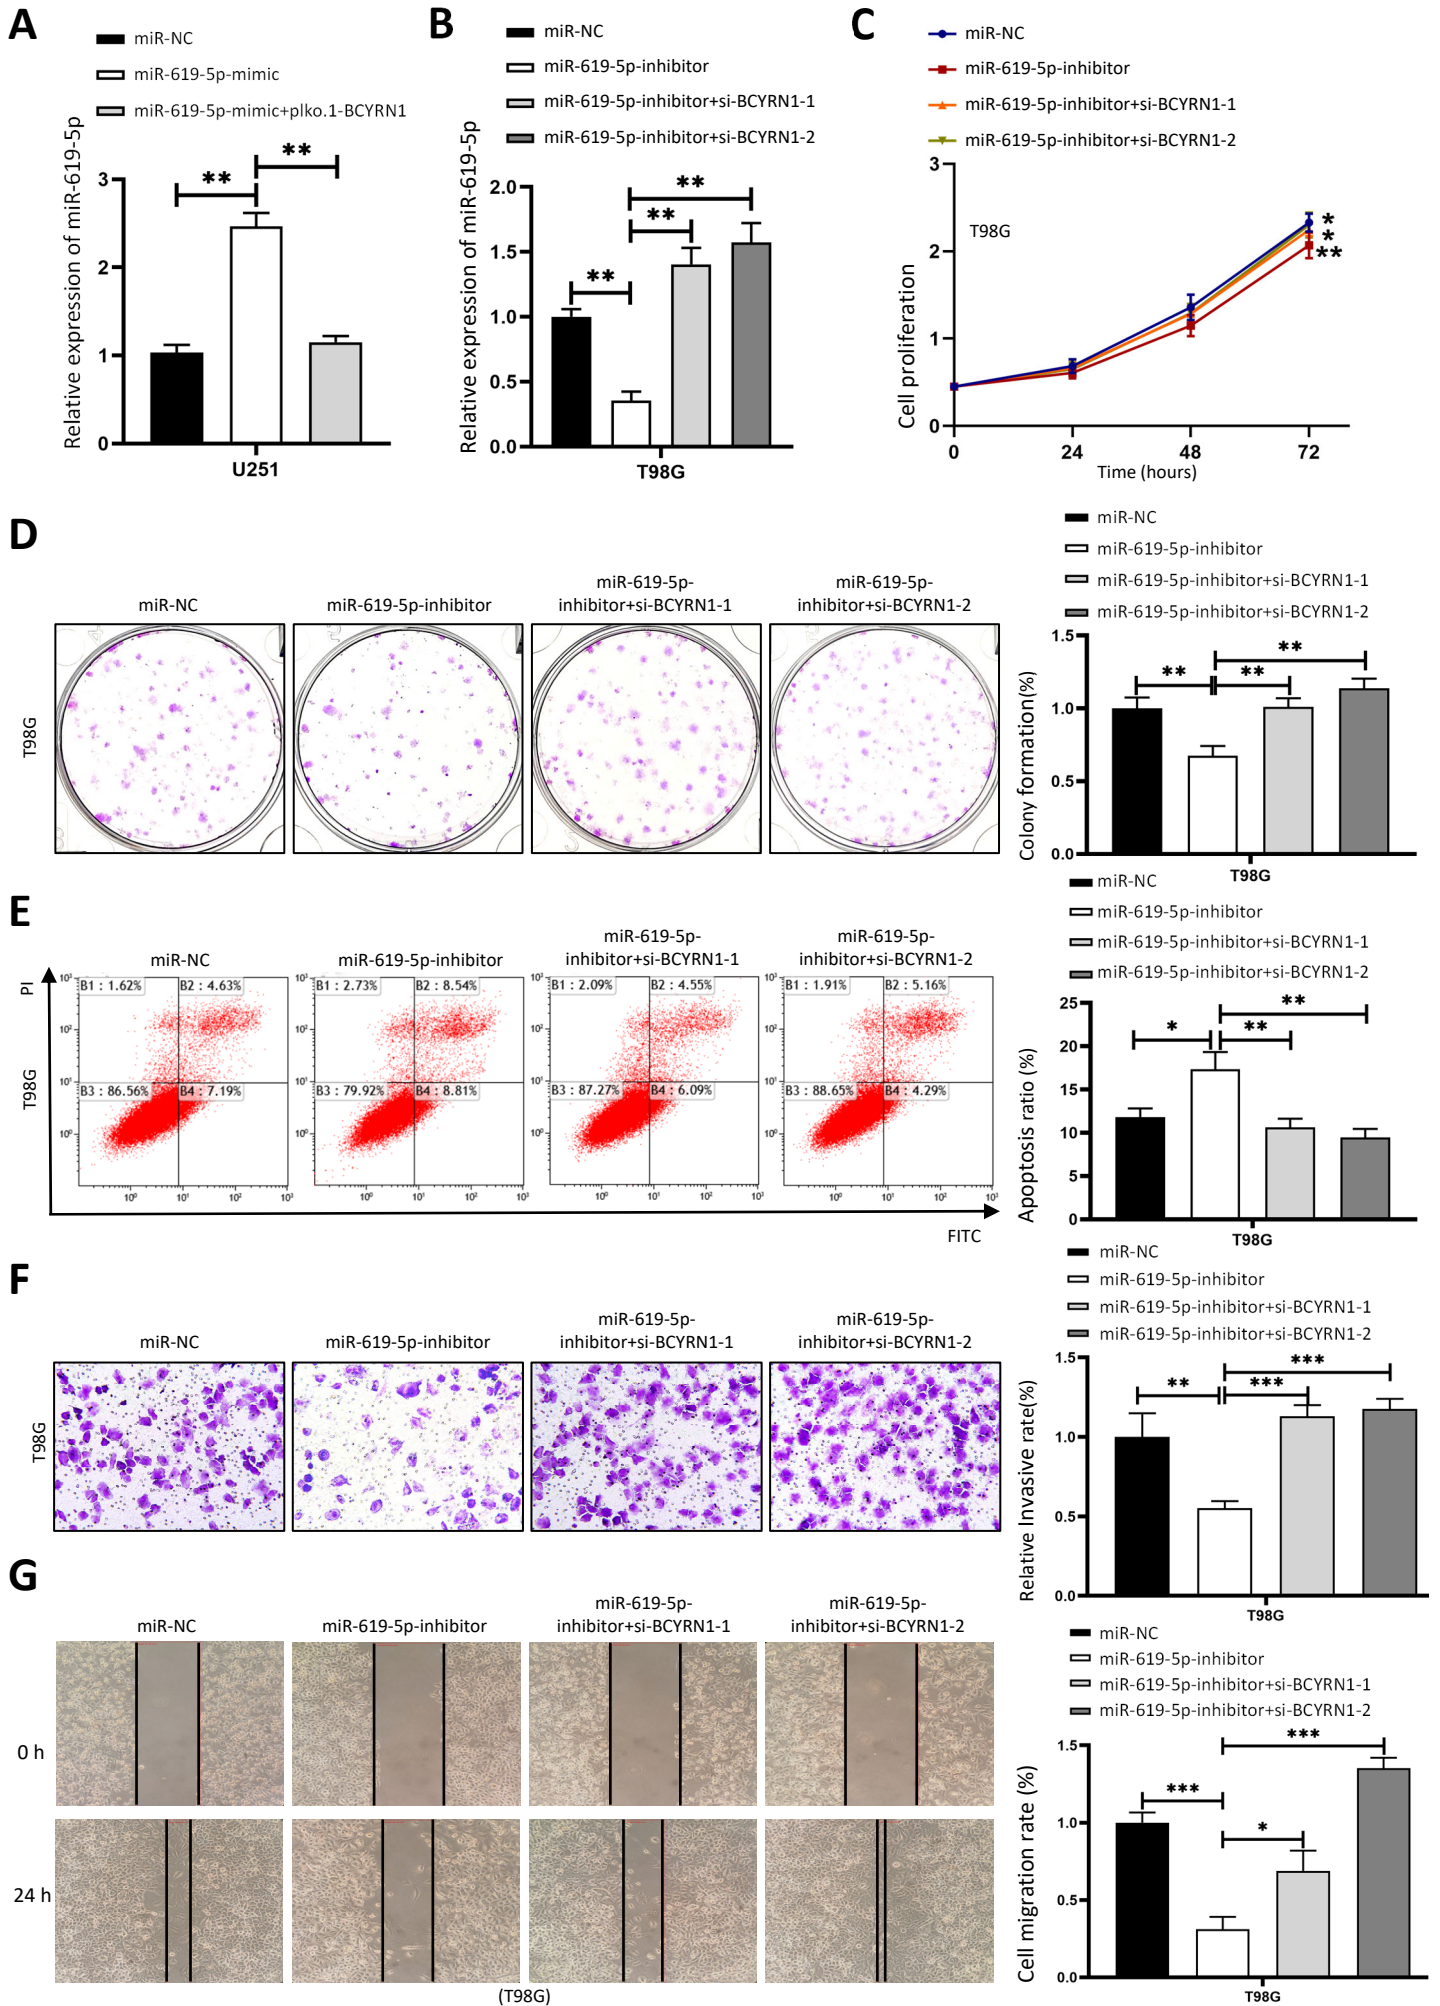

Supplement: 41388_2020_1466_MOESM5_ESM.pdf [file 41388_2020_1466_MOESM5_ESM.pdf]
